# Supplementary material for: A New Ergosterol Analog, a New Bis-Anthraquinone and Anti-Obesity Activity of Anthraquinones from the Marine Sponge-Associated Fungus Talaromyces stipitatus KUFA 0207
Source: PubMed Central journal article supplement (PMC5450545; doi:10.3390/md15050139), 2017-05-16
Supplement: marinedrugs-15-00139-s001.pdf [file marinedrugs-15-00139-s001.pdf]

## Supplementary Information

### **A New Ergosterol Analogue, a New Bis-Anthraquinone and Anti-obesity Activity of Anthraquinones from the Marine Sponge-Associated Fungus *Talaromyces stipitatus* KUFA 0207**

Jidapa Noinart <sup>1</sup>, Suradet Buttachon <sup>1,2</sup>, Tida Dethoup <sup>3</sup>, Luís Gales <sup>1,4</sup>, José A. Pereira <sup>1,2</sup>, Ralph Urbatzka <sup>2</sup>, Sara Freitas <sup>2</sup>, Michael Lee <sup>5</sup>, Artur M.S. Silva <sup>6</sup>, Madalena M. M. Pinto <sup>2,7</sup>, Vítor Vasconcelos <sup>2,8</sup>, Anake Kijjoa <sup>1,2\*</sup>

<sup>1</sup> ICBAS-Instituto de Ciências Biomédicas Abel Salazar, Rua de Jorge Viterbo Ferreira, 228, 4050-313 Porto, Portugal. E-mail: [jidainoart@gmail.com](mailto:jidainoart@gmail.com) (JN), [jpereira@icbas.up.pt](mailto:jpereira@icbas.up.pt) (JAP).

<sup>2</sup> Interdisciplinary Centre of Marine and Environmental Research (CIIMAR), Terminal de Cruzeiros do Porto de Leixões, Av. General Norton de Matos s/n, 4450-208, Matosinhos, Portugal. E-mail: [nokrari\\_209@hotmail.com](mailto:nokrari_209@hotmail.com) (SB), [ralph.urbatzka.ciimar@gmail.com](mailto:ralph.urbatzka.ciimar@gmail.com) (RU), [freitas.srf.09@gmail.com](mailto:freitas.srf.09@gmail.com) (SF), [vmvascon@fc.up.pt](mailto:vmvascon@fc.up.pt) (VV).

<sup>3</sup> Department of Plant Pathology, Faculty of Agriculture, Kasetsart University, Bangkok 10240, Thailand. E-mail: [tdethoup@yahoo.com](mailto:tdethoup@yahoo.com).

<sup>4</sup> Instituto de Biologia Molecular e Celular (IBMC), Universidade do Porto, Rua de Jorge Viterbo Ferreira, 228, 4050-313 Porto, Portugal. E-mail: [lgales@ibmc.up.pt](mailto:lgales@ibmc.up.pt).

<sup>5</sup> Department of Chemistry, University of Leicester, University Road, Leicester LE 7 RH, UK. E-mail: [ml34@leicester.ac.uk](mailto:ml34@leicester.ac.uk).

<sup>6</sup> Departamento de Química & QOPNA, Universidade de Aveiro, 3810-193 Aveiro, Portugal. E-mail: [artur.silva@ua.pt](mailto:artur.silva@ua.pt).

<sup>7</sup> Laboratório de Química Orgânica, Departamento de Ciências Químicas, Faculdade de Farmácia, Universidade do Porto, Rua de Jorge Viterbo Ferreira, 228, 4050-313 Porto, Portugal. E-mail: [madalena@ff.up.pt](mailto:madalena@ff.up.pt).

<sup>8</sup> Departamento de Biologia, Faculdade de Ciências, Universidade do Porto, Rua do Campo Alegre, s/n, 4169-007 Porto, Portugal

\* To whom correspondence should be addressed, E-mail: [ankijjoa@icbas.up.pt](mailto:ankijjoa@icbas.up.pt); Tel.: +351-220428331. Fax: +351-22-2062232.

**Figure S1.** <sup>1</sup>H NMR spectrum of compound **1** (CDCl<sub>3</sub>, 300.13 MHz).

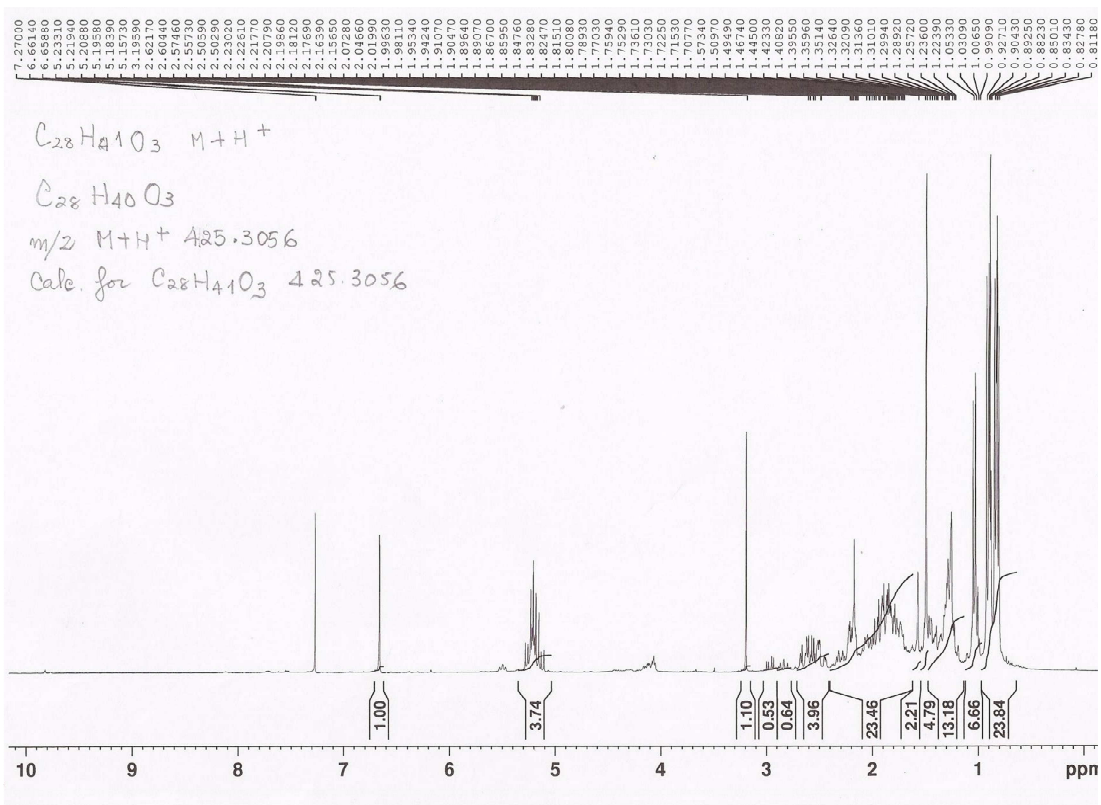

Figure S2.  $^{13}C$  NMR spectrum of compound **1** ( $CDCl_3$ , 75.4 MHz).

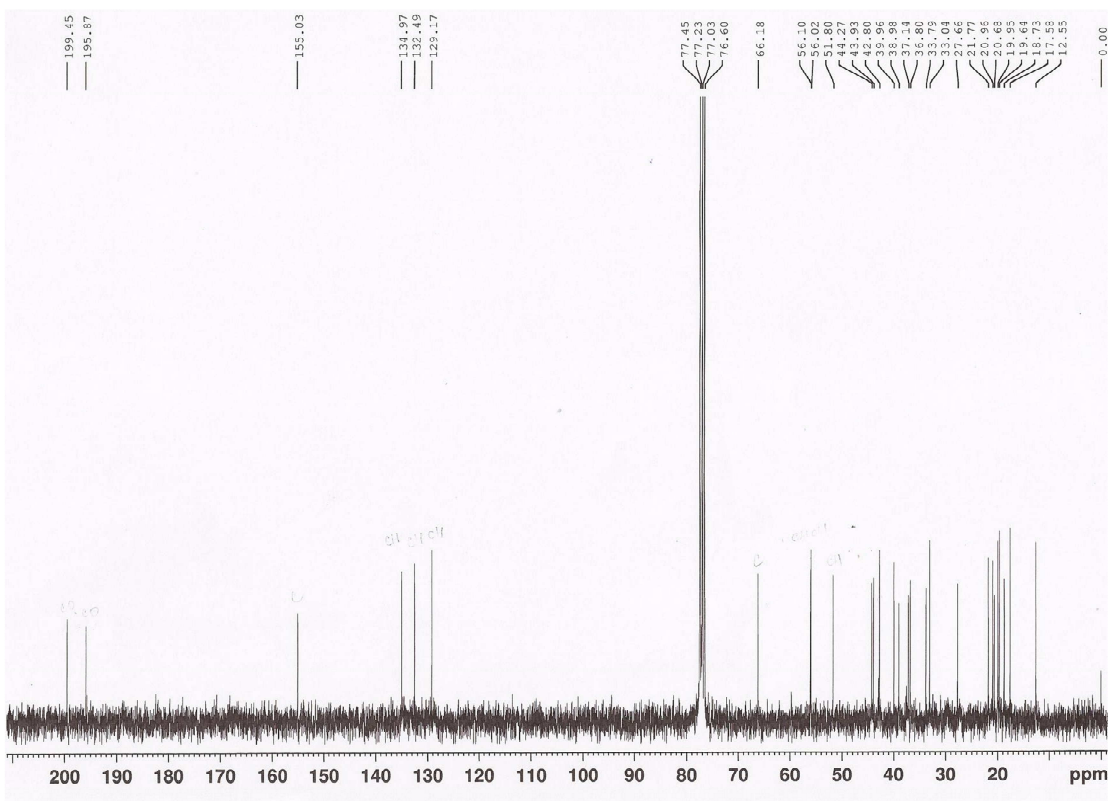

Figure S3. COSY spectrum of compound **1** ( $CDCl_3$ , 300.13 MHz).

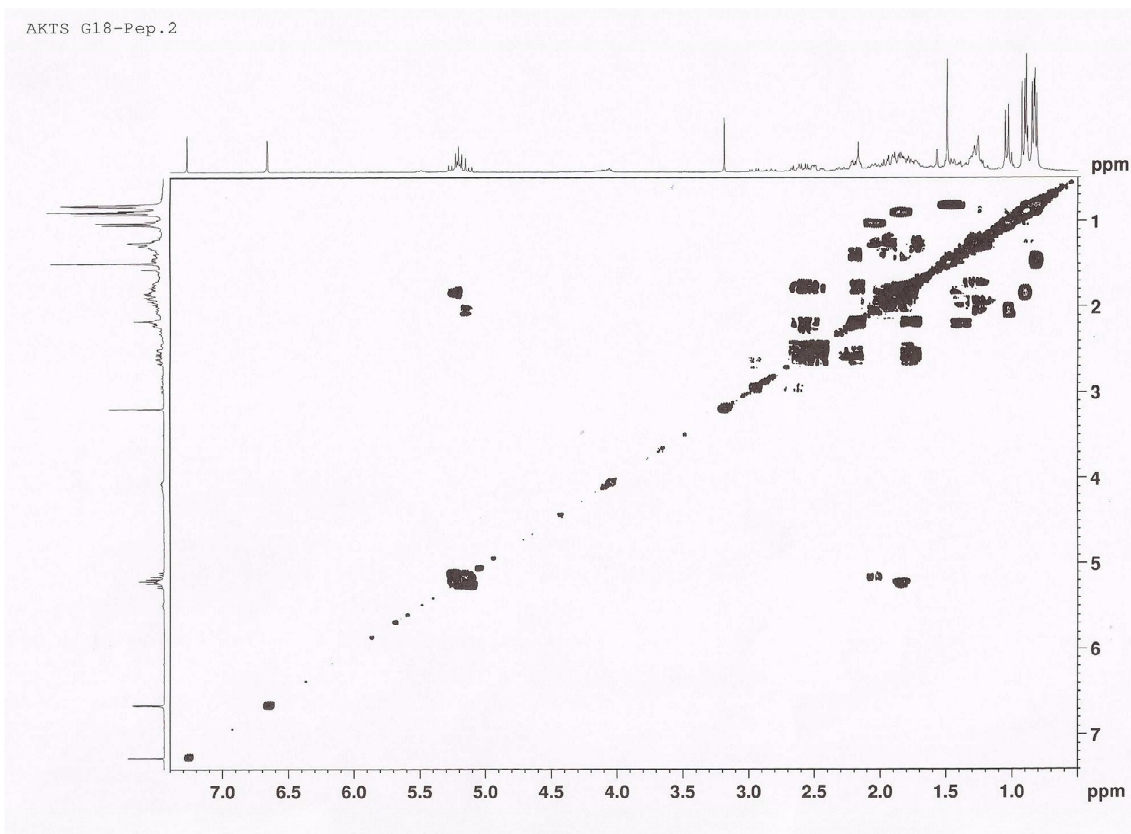

**Figure S4.** HSQC spectrum of compound **1** (CDCl<sub>3</sub>, 300.13 MHz).

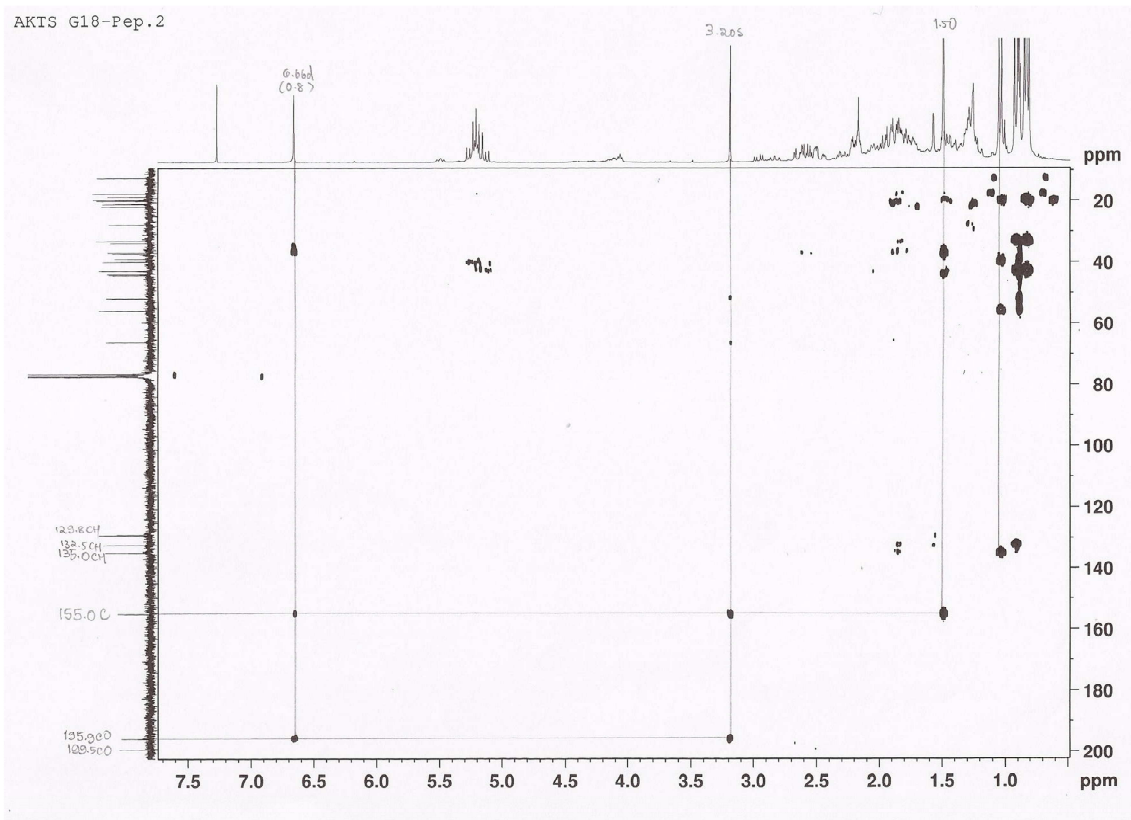

**Figure S5.** HMBC spectrum of compound **1** (CDCl<sub>3</sub>, 300.13 MHz).

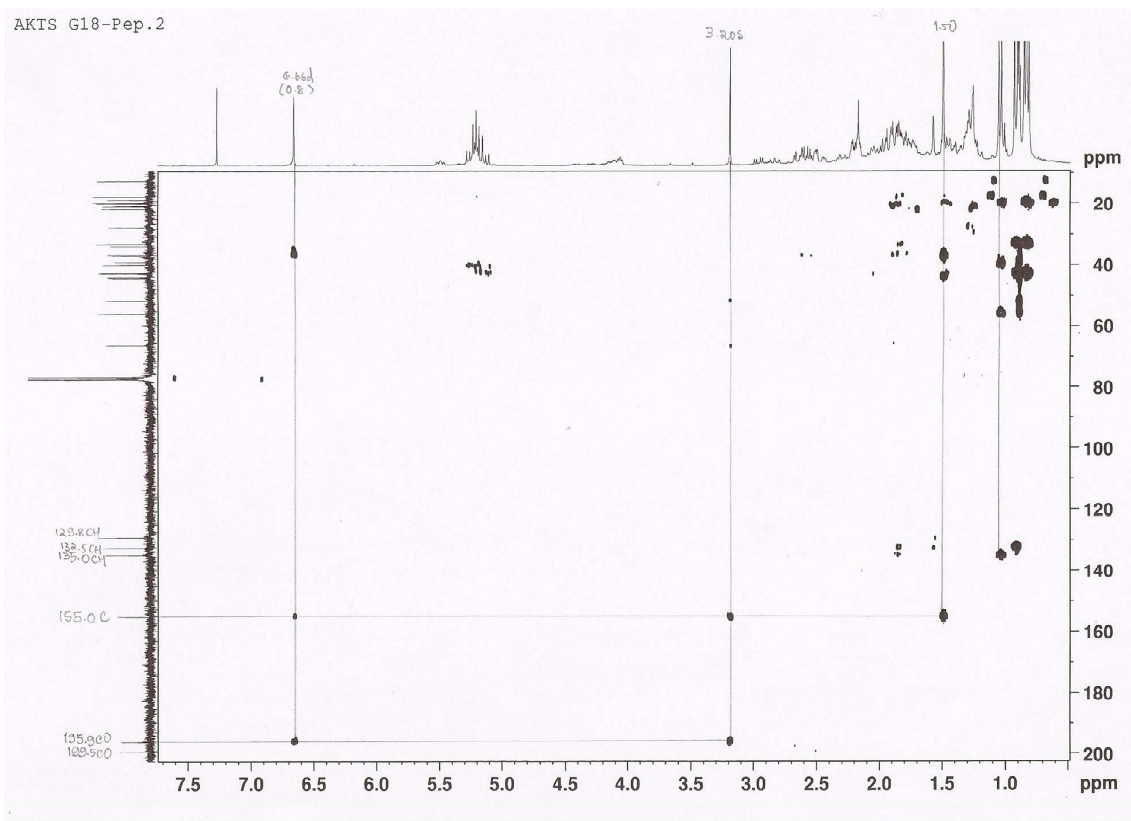

**Figure S6.** NOESY spectrum of compound **1** ( $\text{CDCl}_3$ , 500.13 MHz).

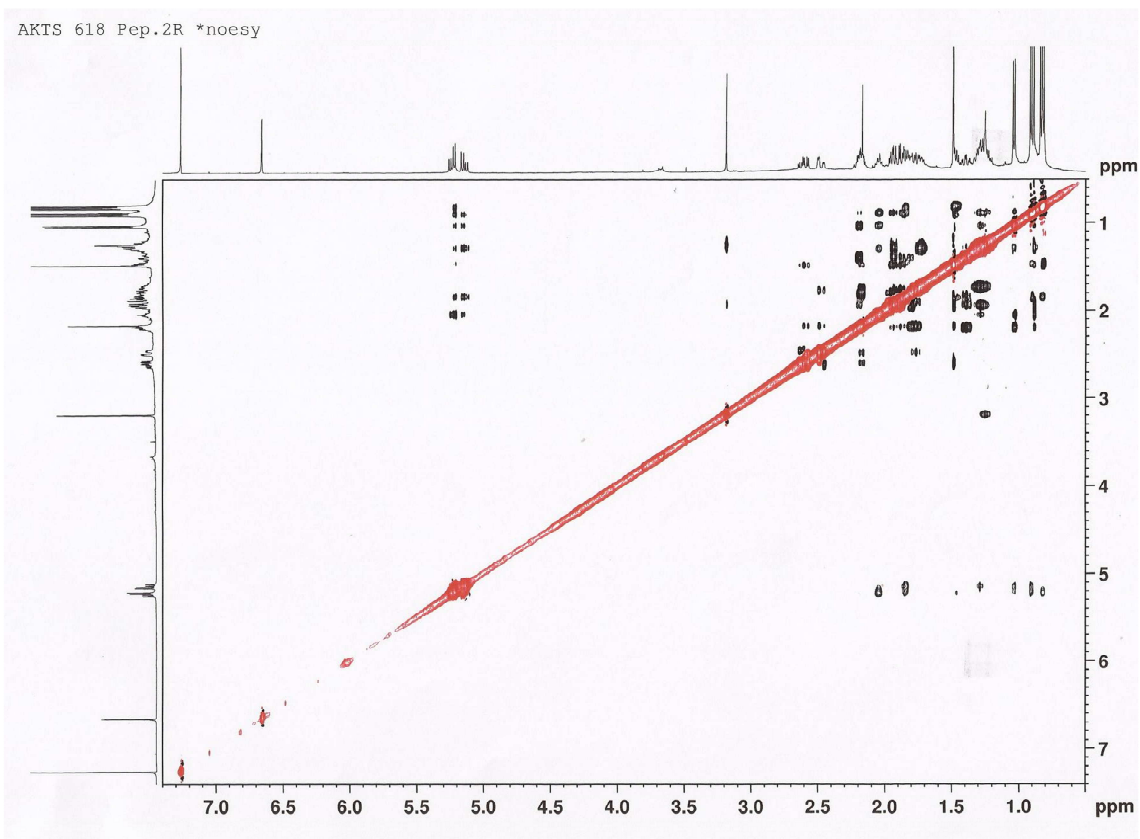

**Figure S7.** ROESY spectrum of compound **1** (CDCl<sub>3</sub>, 500.13 MHz).

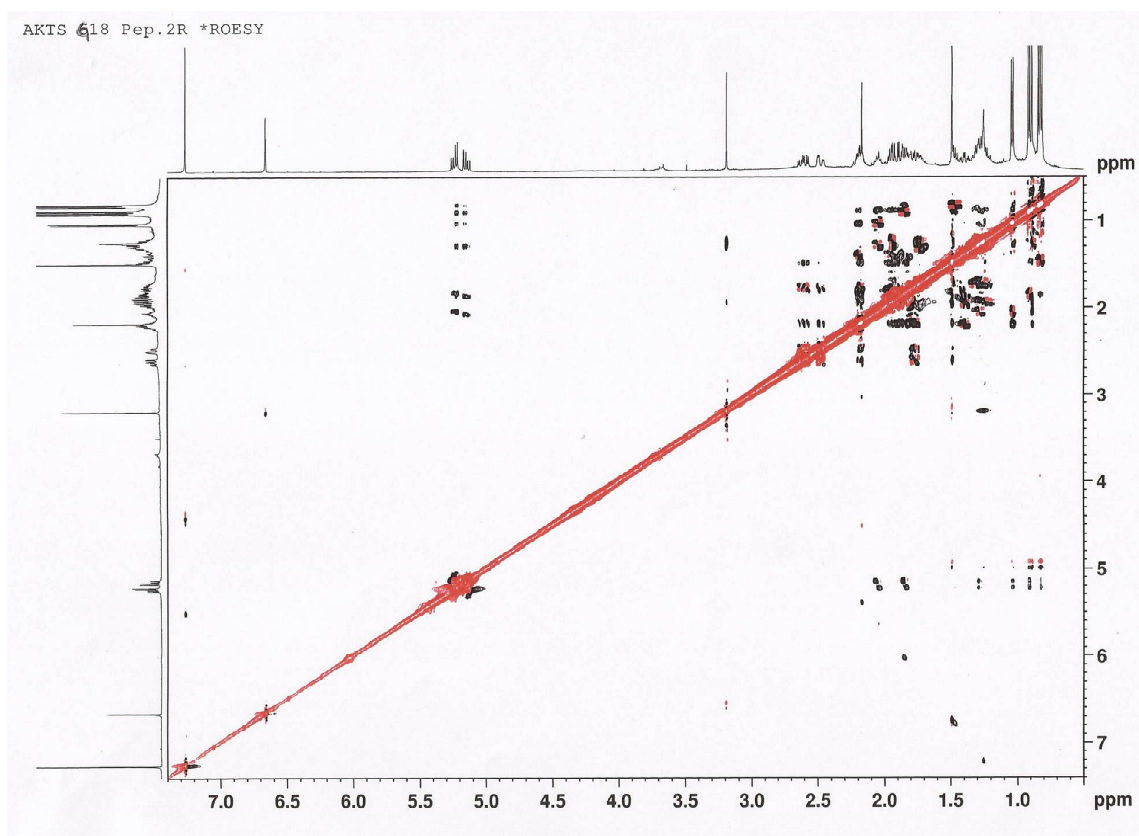

**Figure S8.** <sup>1</sup>H NMR spectrum of compound **2** (CDCl<sub>3</sub>, 300.13 MHz).

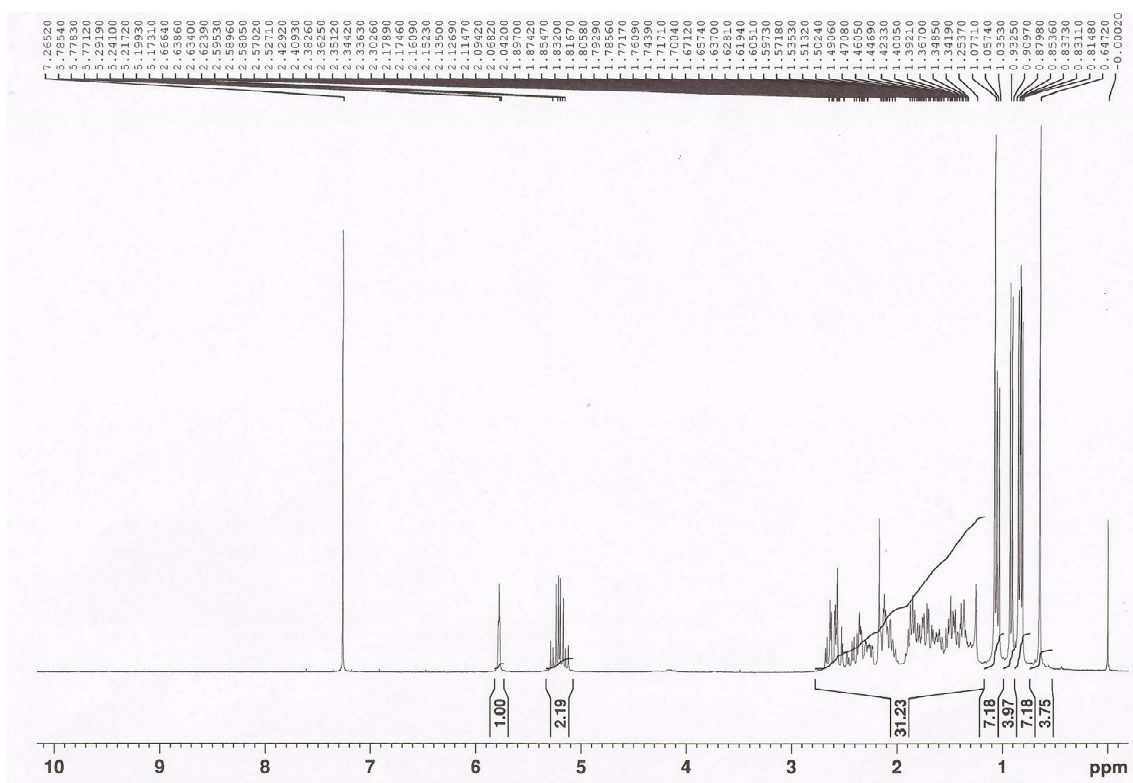

**Figure S9.**  $^{13}\text{C}$  NMR spectrum of compound **2** ( $\text{CDCl}_3$ , 75.4 MHz).

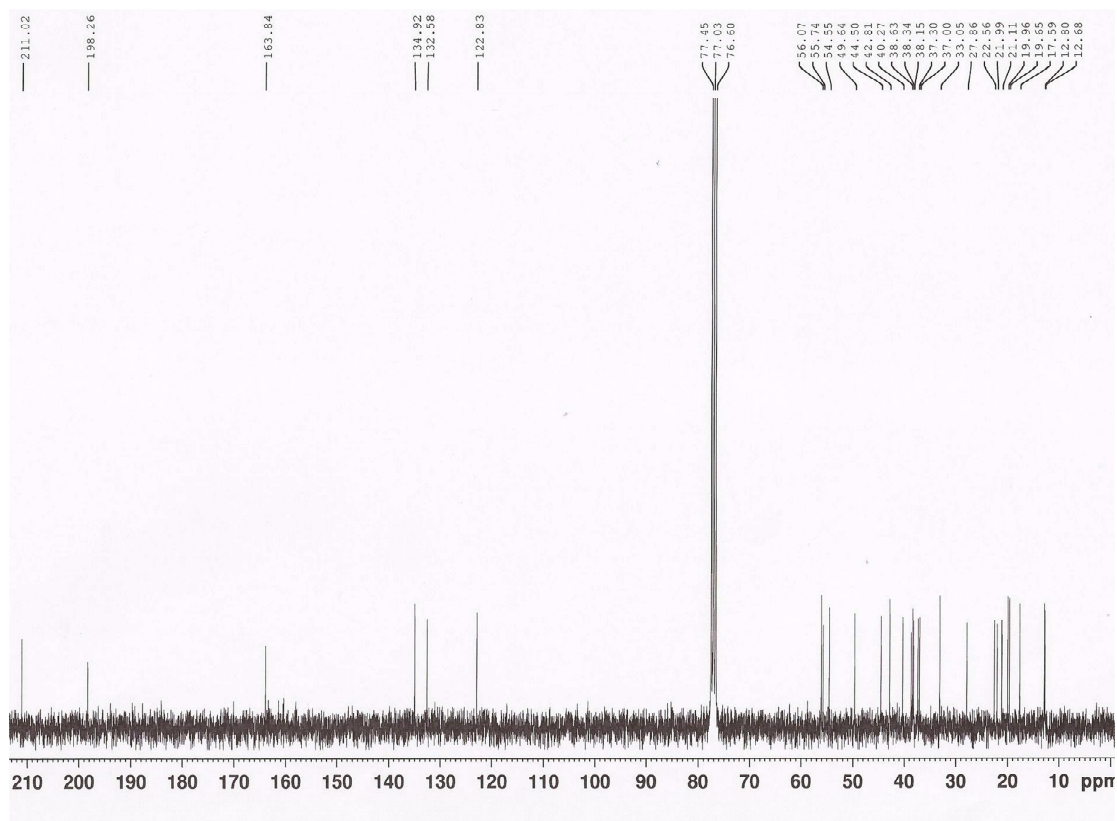

**Figure S10.** COSY spectrum of compound **2** ( $\text{CDCl}_3$ , 300.13 MHz).

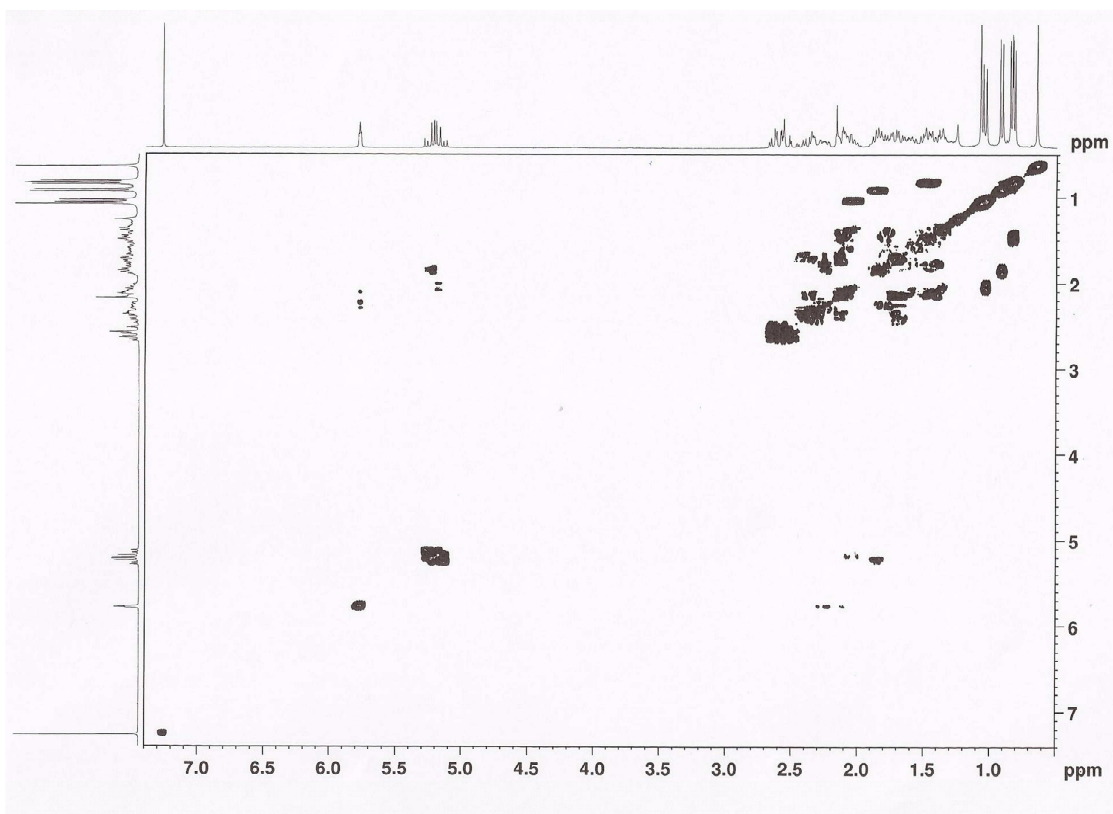

**Figure S11.** HSQC spectrum of compound **2** (CDCl<sub>3</sub>, 300.13 MHz).

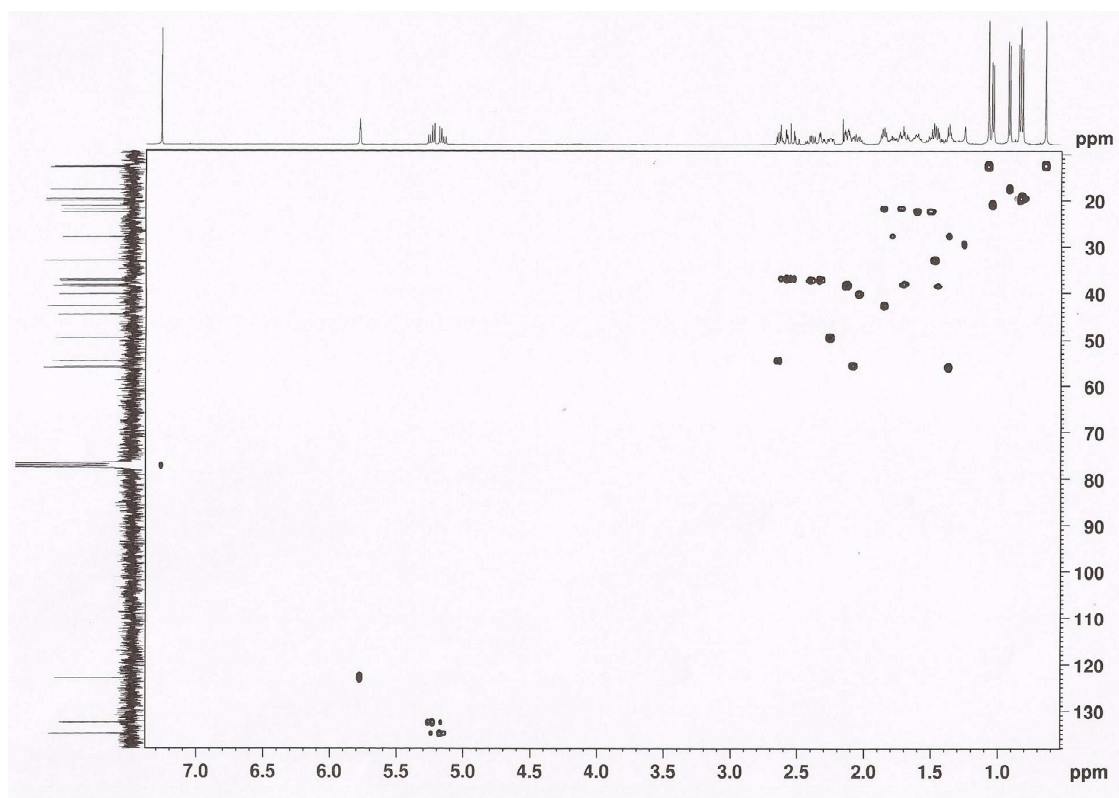

**Figure S12.** HMBC spectrum of compound **2** (CDCl<sub>3</sub>, 300.13 MHz).

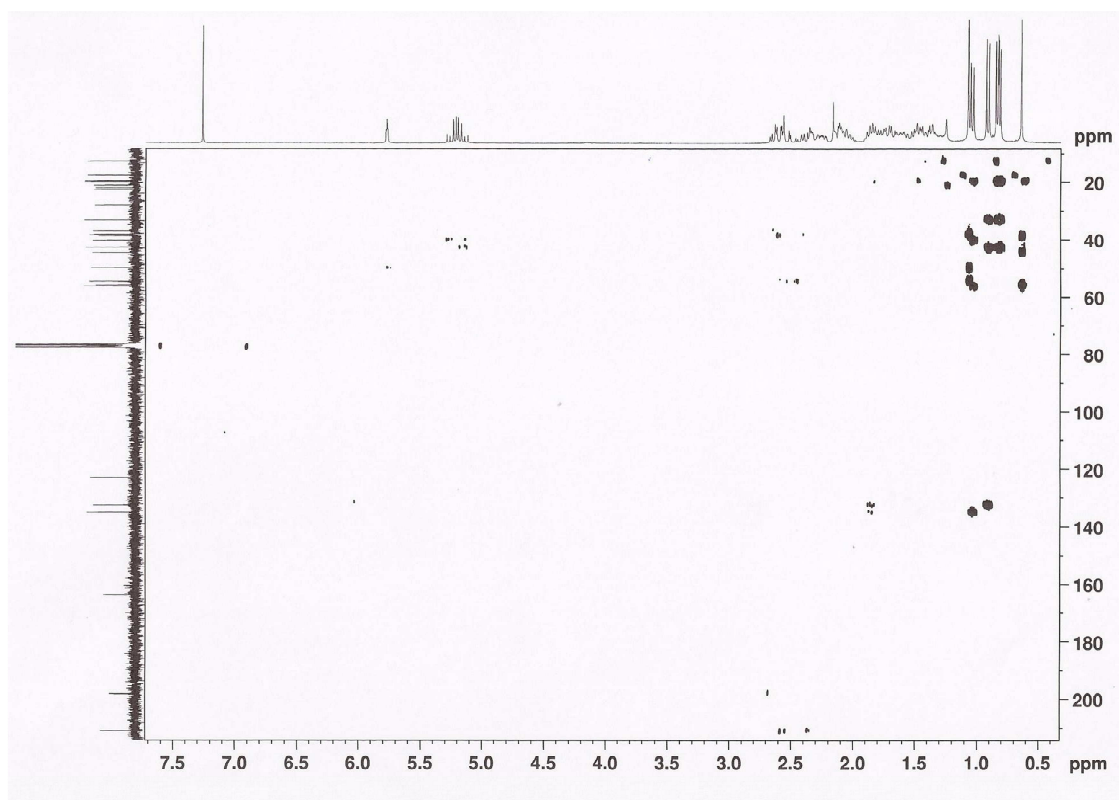

**Figure S13.**  $^1\text{H}$  NMR spectrum of compound **3** (DMSO, 500.13 MHz).

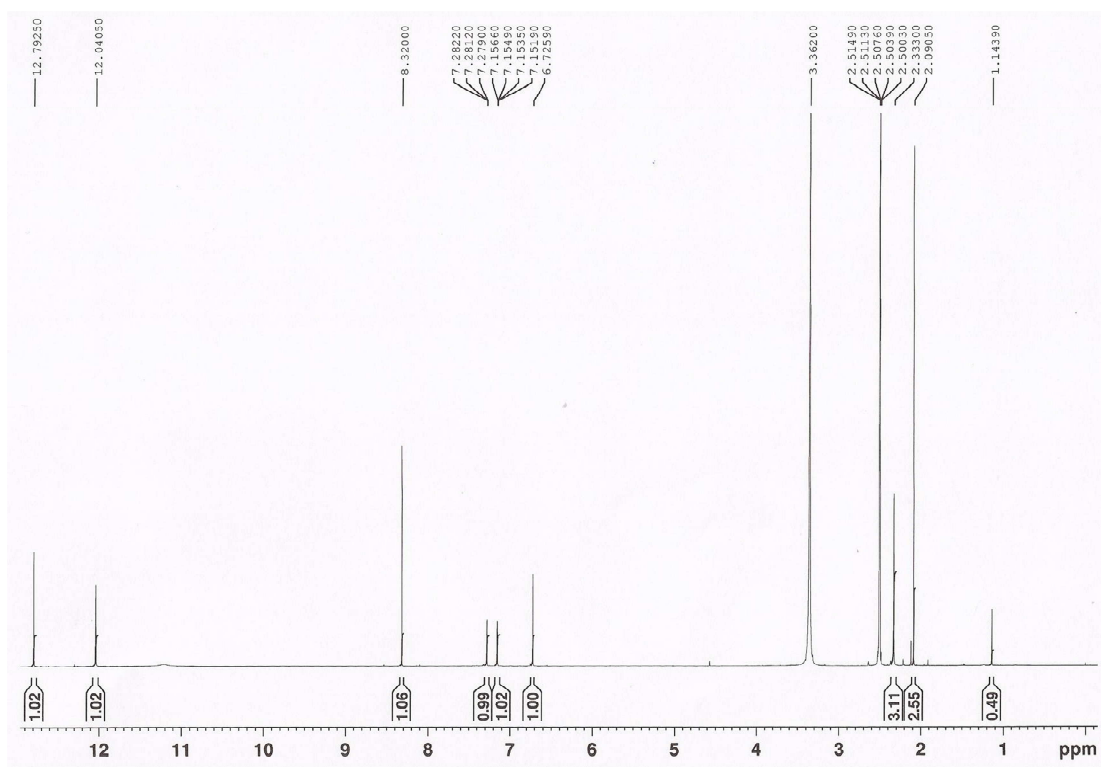

**Figure S14.**  $^{13}\text{C}$  NMR spectrum of compound **3** (DMSO, 125.4 MHz).

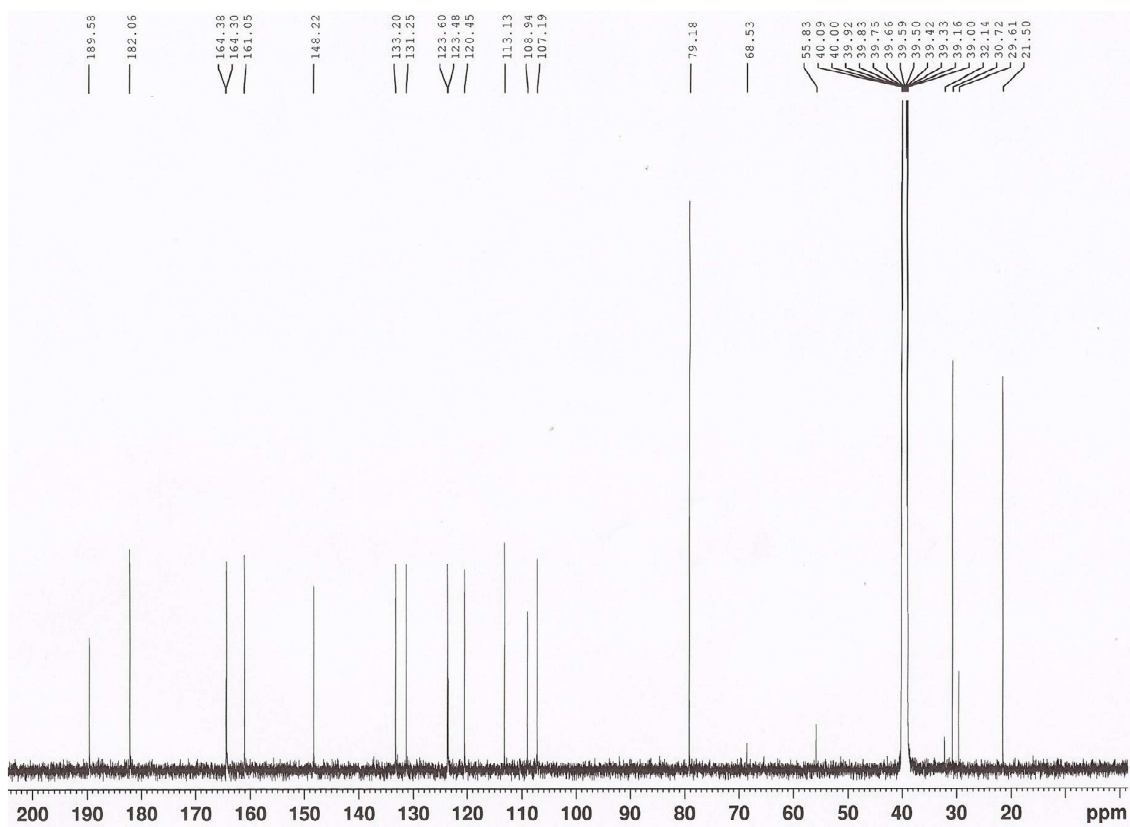



**Figure S15.** COSY spectrum of compound **3** (DMSO, 500.13 MHz).

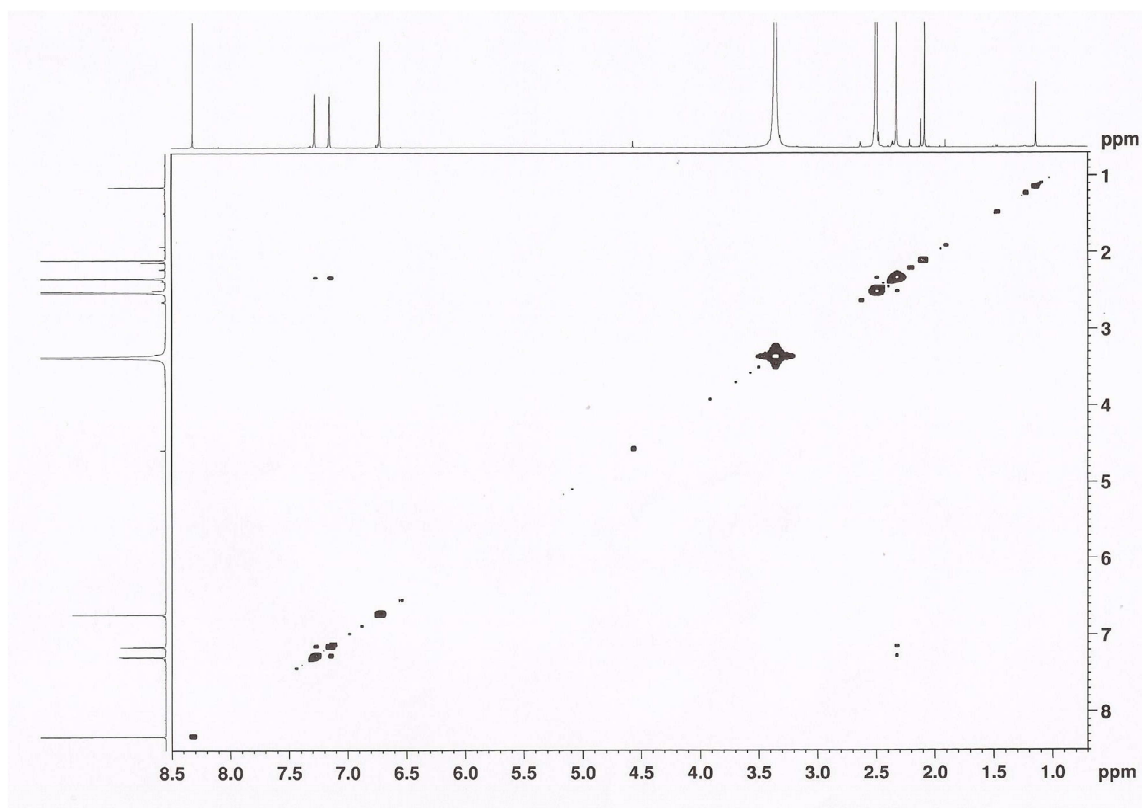

**Figure S16.** HSQC spectrum of compound **3** (DMSO, 500.13 MHz).

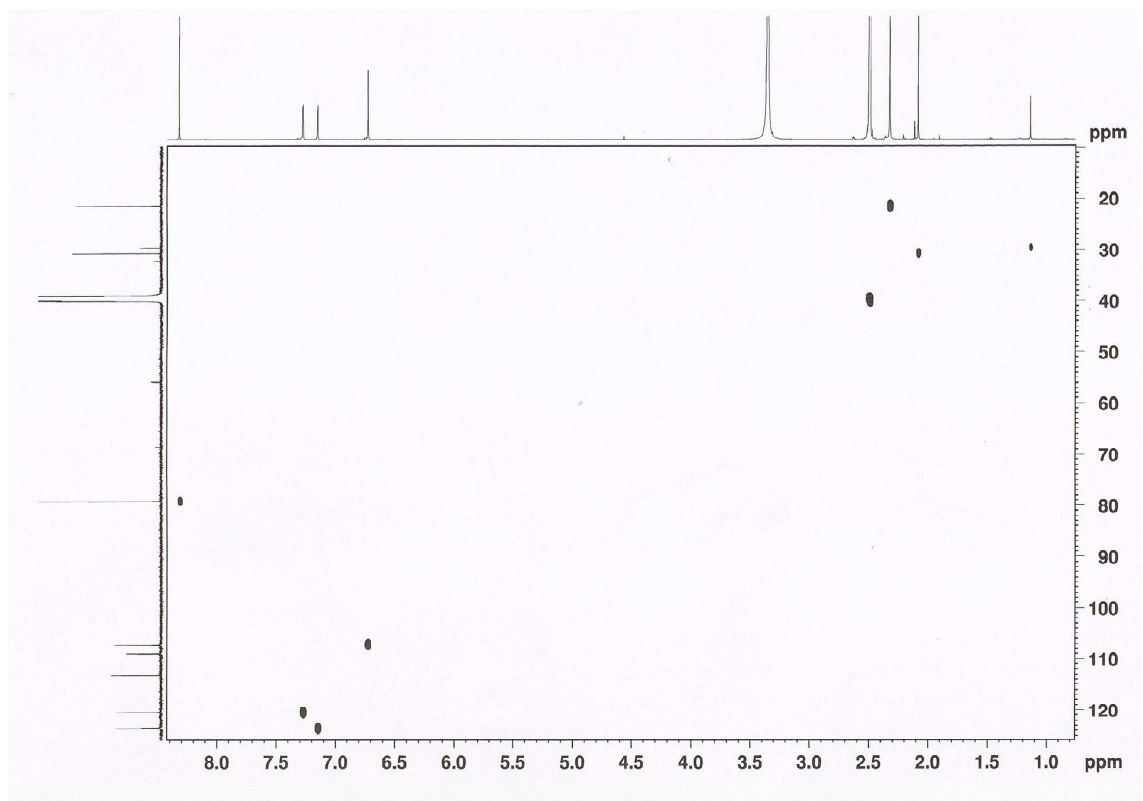

**Figure S17.** HMBC spectrum of compound **3** (DMSO, 500.13 MHz).

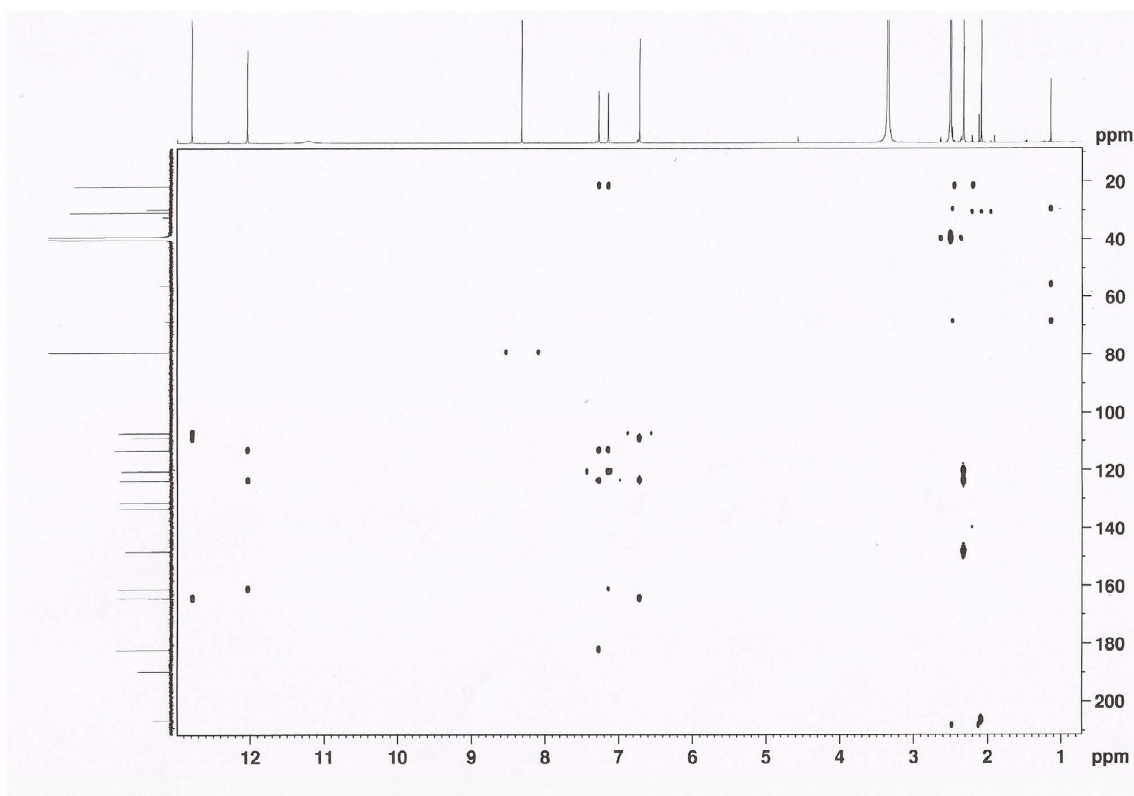

~

**Table 1S**<sup>1</sup>H and <sup>13</sup>C NMR (CDCl<sub>3</sub>, 300.13 MHz and 75.4 MHz) and HMBC assignment for **2**.

| Position | $\delta_C$ , type     | $\delta_H$ , ( <i>J</i> in Hz) | COSY         | HMBC             |
|----------|-----------------------|--------------------------------|--------------|------------------|
| 1        | 38.2, CH <sub>2</sub> | 1.70, m<br>2.14, m             |              |                  |
| 2        | 37.3, CH <sub>2</sub> | 2.33, m<br>2.38, m             |              | CO-3             |
| 3        | 211.0, CO             | -                              |              |                  |
| 4        | 37.0, CH <sub>2</sub> | 2.59, m                        | H-5          | CO-3             |
| 5        | 54.6, CH              | 2.64, dd (12.8, 4.5)           | H-4          |                  |
| 6        | 198.3, CO             | -                              |              |                  |
| 7        | 122.8, CH             | 5.78, t (2.3)                  | H-9, 14      | C-9              |
| 8        | 163.8, C              | -                              |              |                  |
| 9        | 49.6, CH              | 2.26, m                        | H-7, 11      |                  |
| 10       | 38.3, C               | -                              |              |                  |
| 11       | 22.0, CH <sub>2</sub> | 1.72, m<br>1.85, m             |              |                  |
| 12       | 38.6, CH <sub>2</sub> | 1.45, m<br>2.14, m             |              |                  |
| 13       | 44.5, C               | -                              |              |                  |
| 14       | 55.7, C               | 2.09, m                        | H-9, 15      |                  |
| 15       | 22.6, CH <sub>2</sub> | 1.50, m<br>1.60, m             |              |                  |
| 16       | 27.9, CH <sub>2</sub> | 1.37, m<br>1.79, m             |              |                  |
| 17       | 56.1, CH              | 1.36, m                        | H-16, 20     |                  |
| 18       | 12.7, CH <sub>3</sub> | 0.65, s                        | -            |                  |
| 19       | 12.8, CH <sub>3</sub> | 1.08, s                        | -            | C-5, 9, 10       |
| 20       | 40.3, CH              | 2.04, m                        | H-21, 22     |                  |
| 21       | 21.1, CH <sub>3</sub> | 1.05, d (6.6)                  | H-20         | C-17, 20, 22     |
| 22       | 134.9, CH             | 5.16, dd (15.2, 7.9)           | H-20, 23     | C-20, 25         |
| 23       | 132.6, CH             | 5.25, dd (15.2, 7.2)           | H-22, 24     | C-20, 24         |
| 24       | 42.8, CH              | 1.85, m                        | H-22, 25, 26 | C-22, 23         |
| 25       | 33.1, CH              | 1.48, m                        | H-24, 27, 28 | C-23             |
| 26       | 17.6, CH <sub>3</sub> | 0.92, d (6.8)                  | H-24         | C-23, 24, 25     |
| 27       | 20.0, CH <sub>3</sub> | 0.82, d (6.8)                  | H-25         | C-24, 25, 26, 28 |
| 28       | 19.7, CH <sub>3</sub> | 0.84, d (6.8)                  | H-25         | C-24, 25, 26, 27 |
